# Supplementary material for: Validation and Automation of a High-Throughput Multitargeted Method for Semiquantification of Endogenous Metabolites from Different Biological Matrices Using Tandem Mass Spectrometry
Source: MDPI journal article supplement (doi:10.3390/metabo8030044), 2018-08-05

141217016

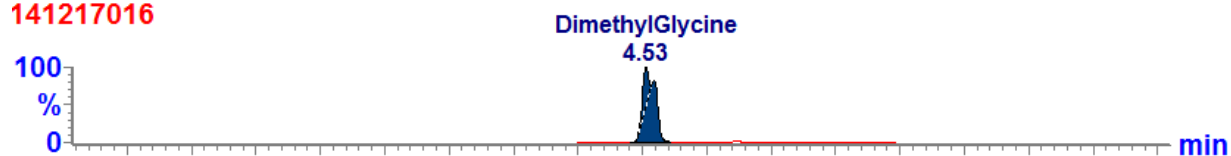

141217016

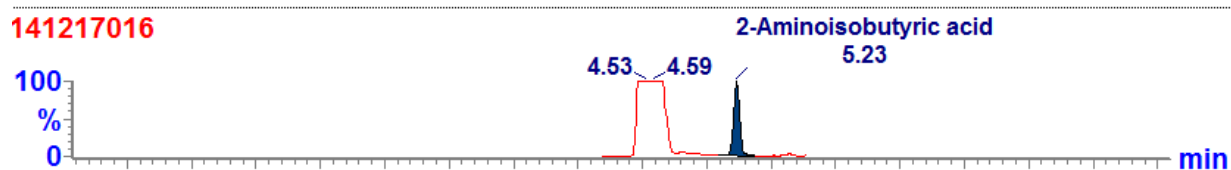

141217016

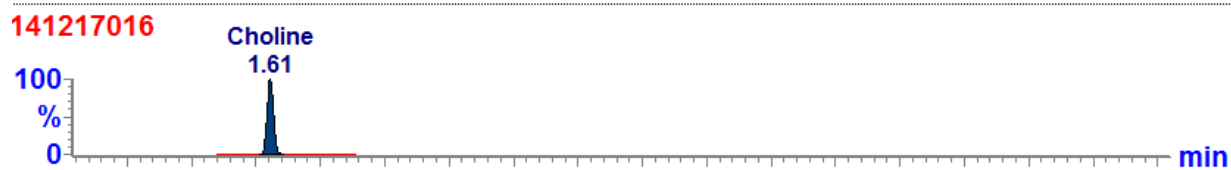

141217016

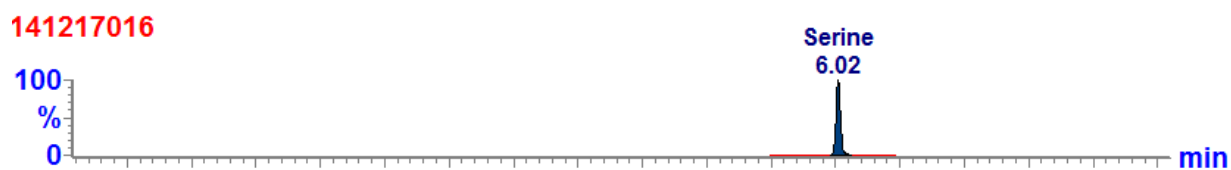

141217016

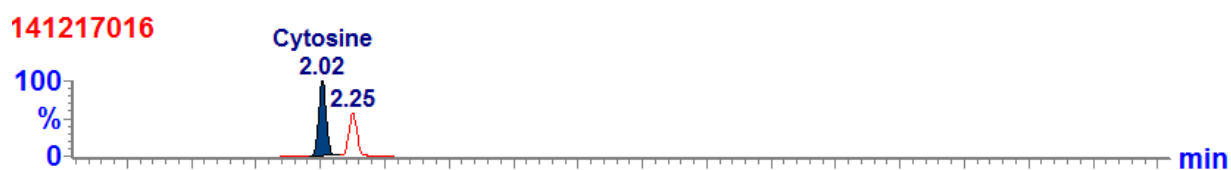

141217016

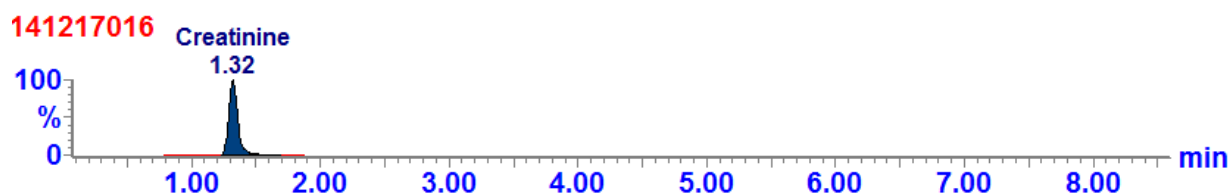

141217016

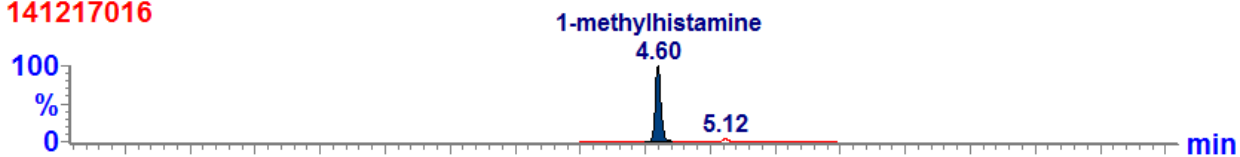

141217016

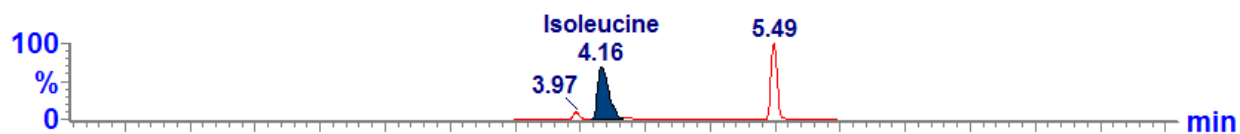

141217016

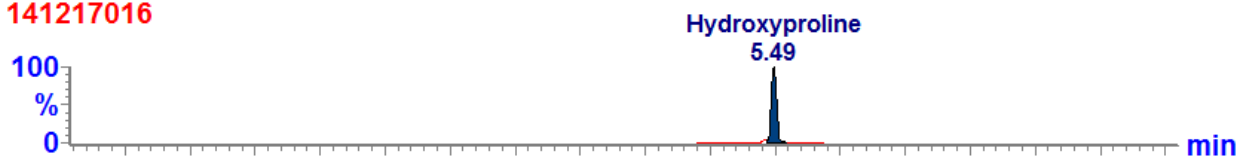

141217016

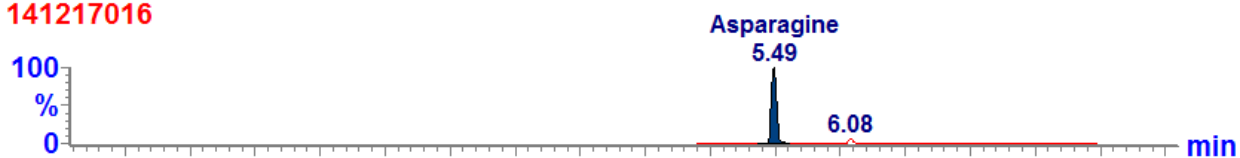

141217016

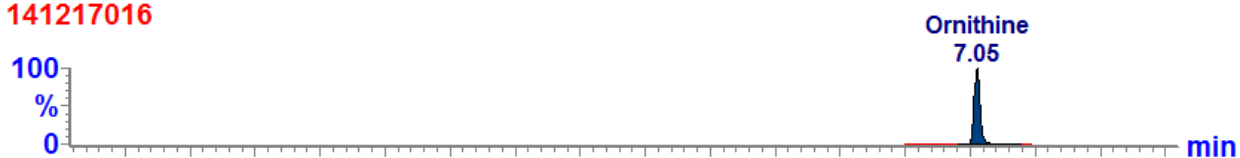

141217016

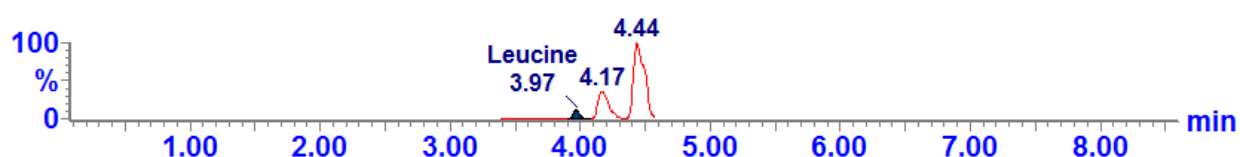

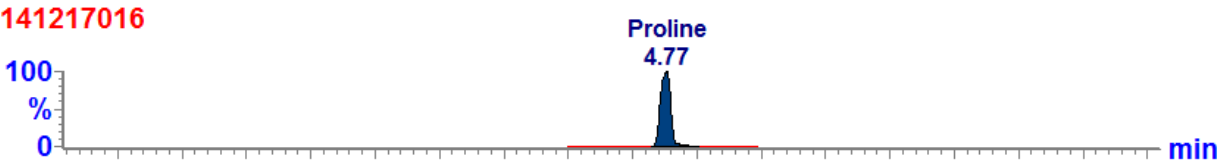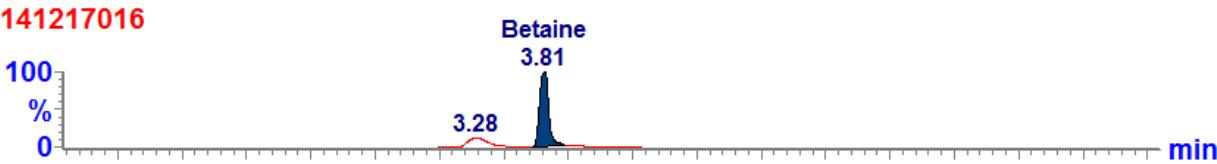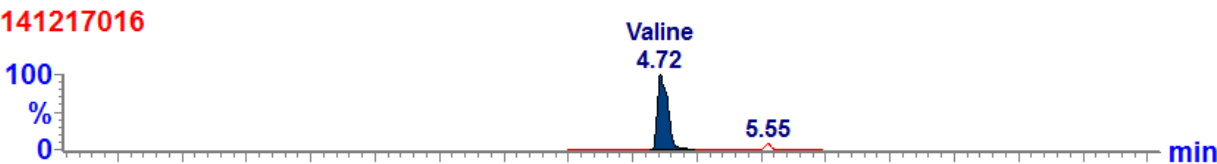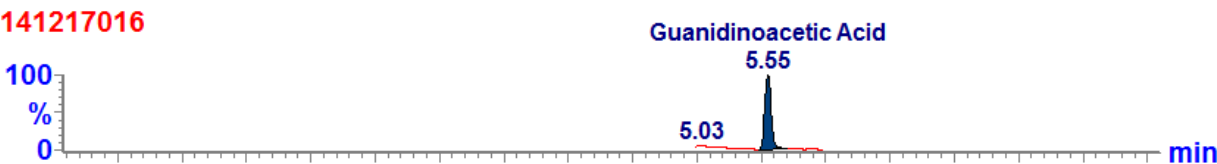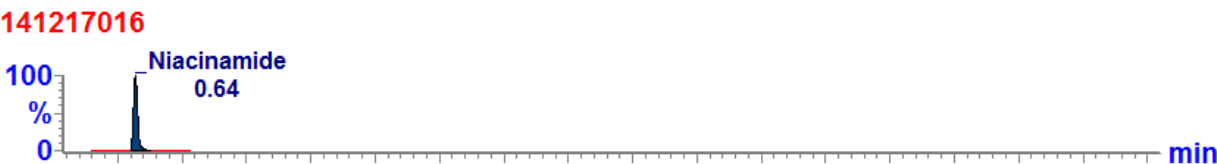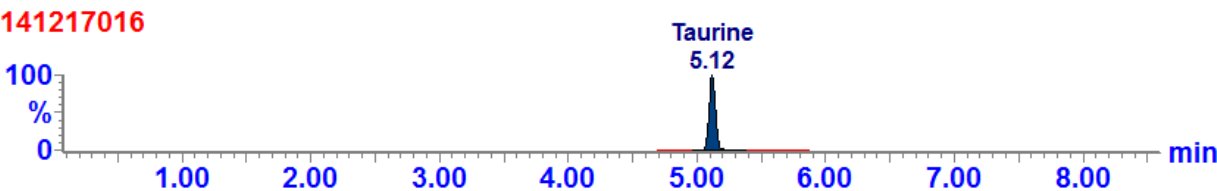

141217016

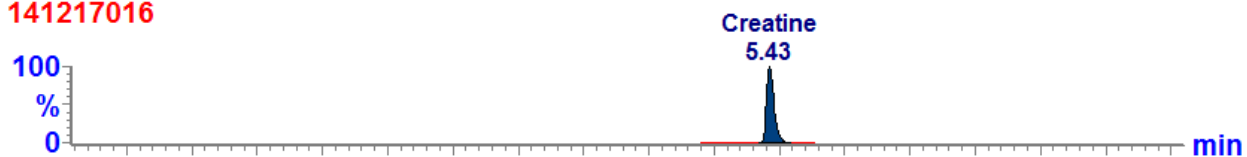

141217016

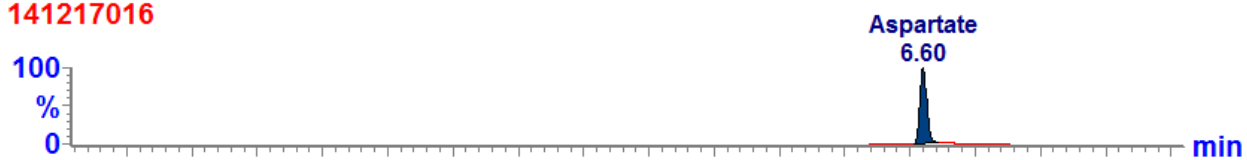

141217016

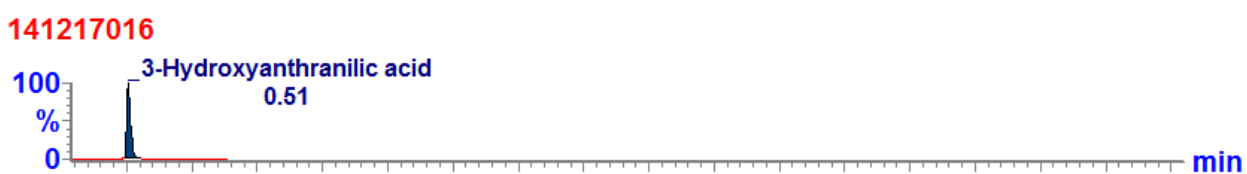

141217016

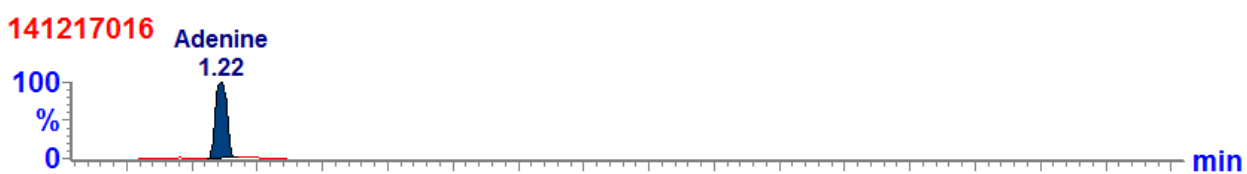

141217016

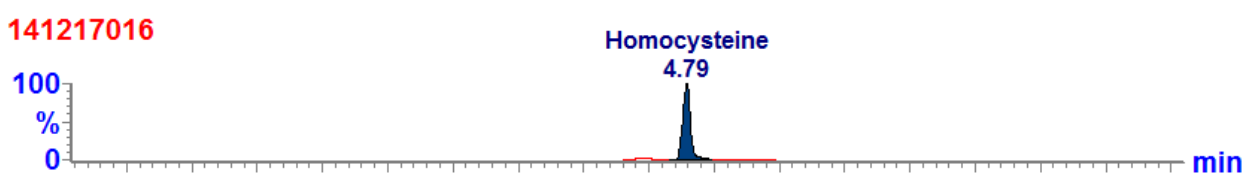

141217016

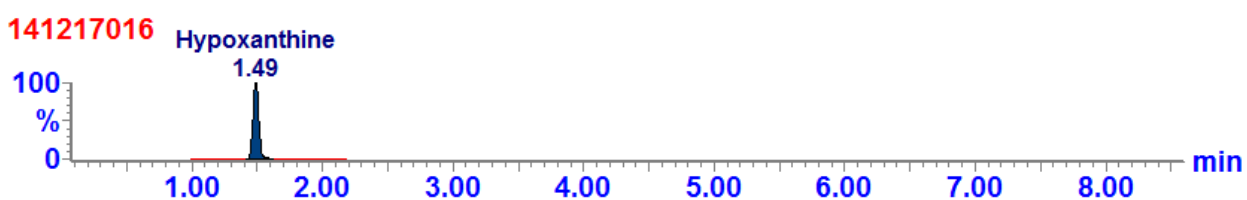

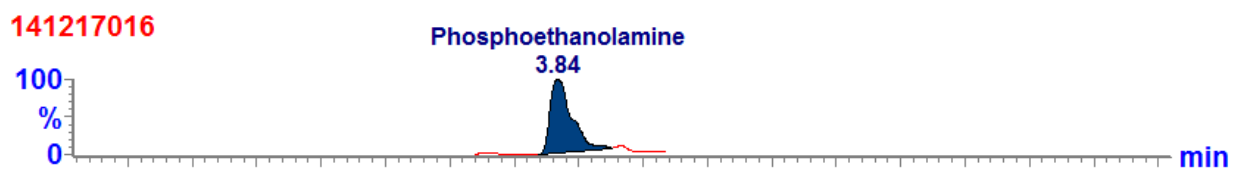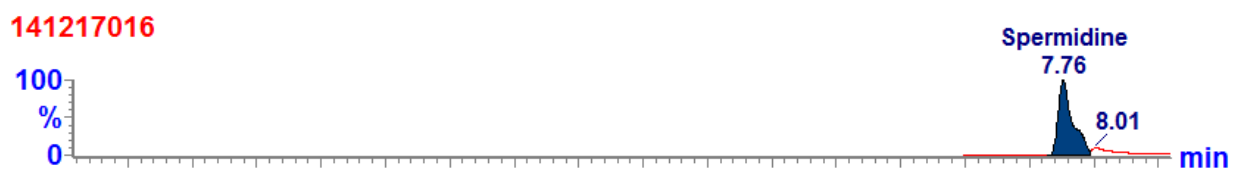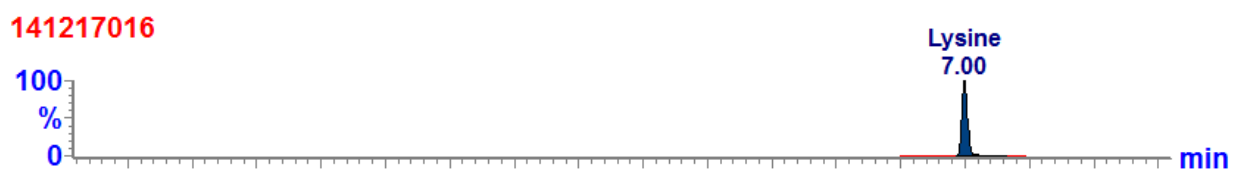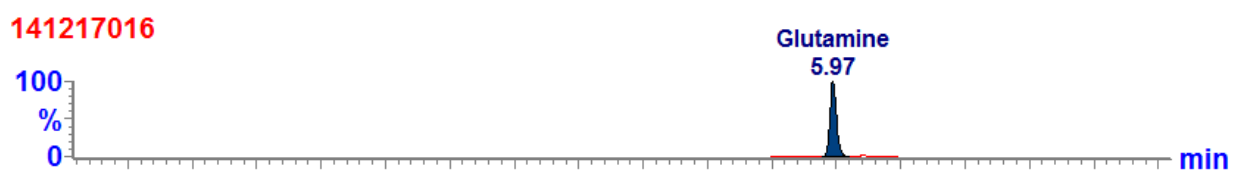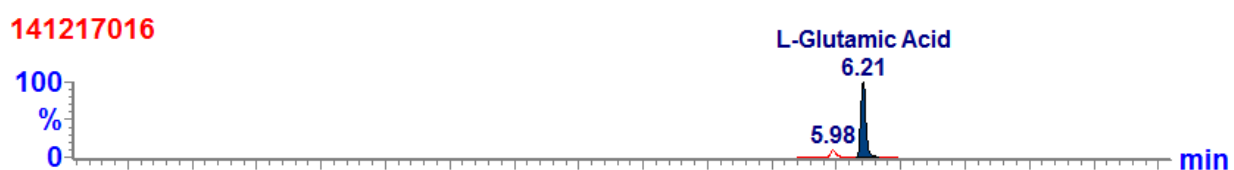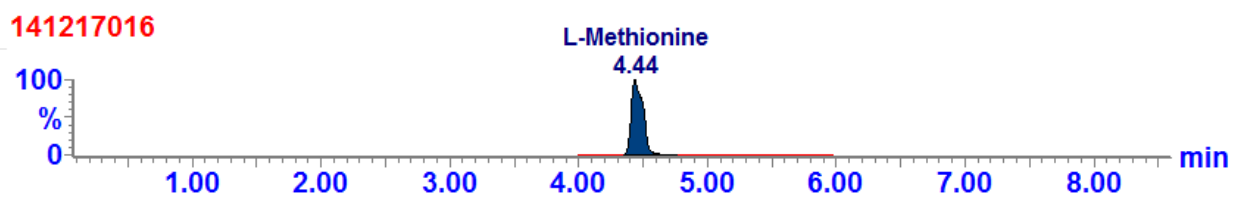

141217016

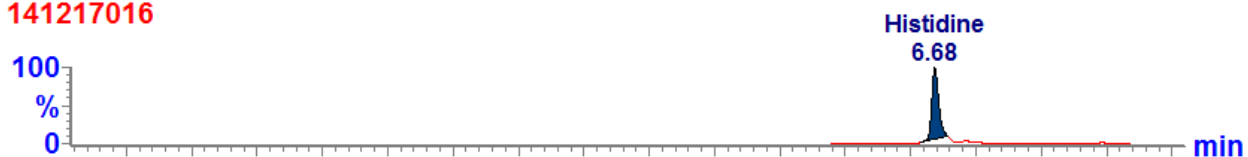

141217016

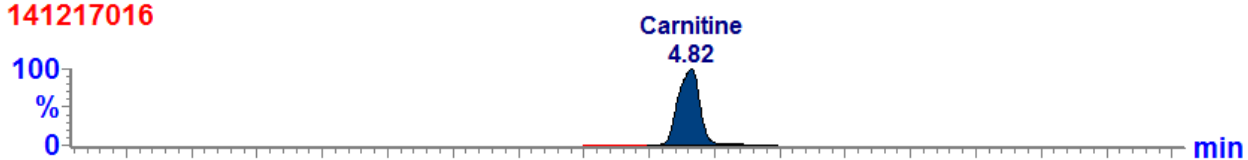

141217016

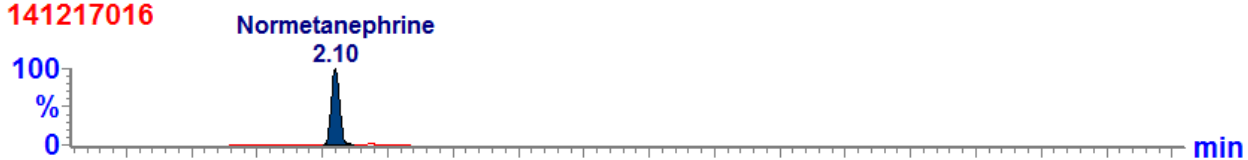

141217016

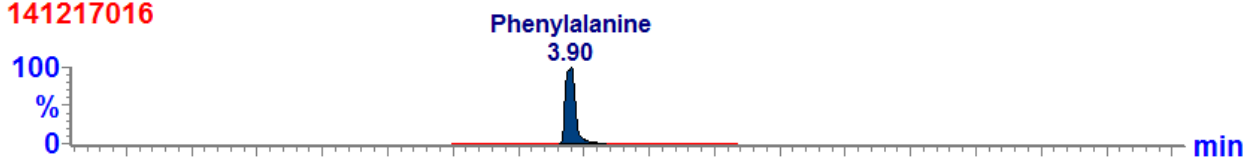

141217016 Pyridoxine  
0.94

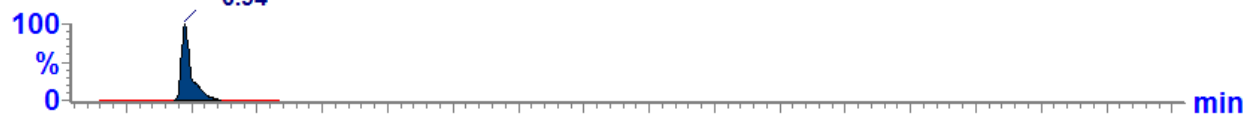

141217016

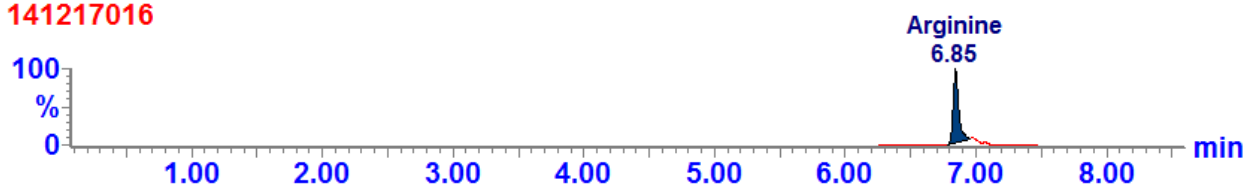

141217016

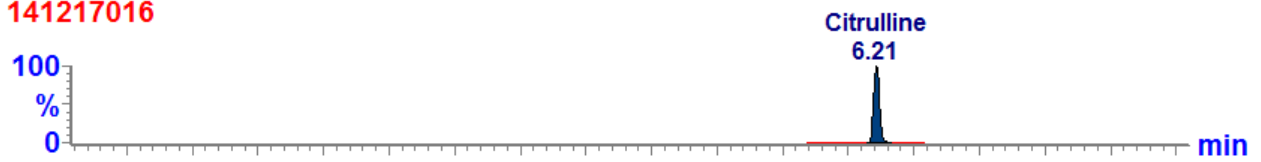

141217016

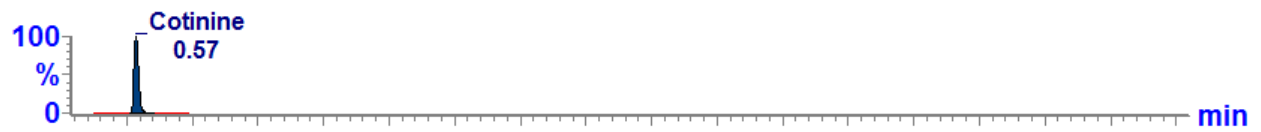

141217016 Hippuric acid

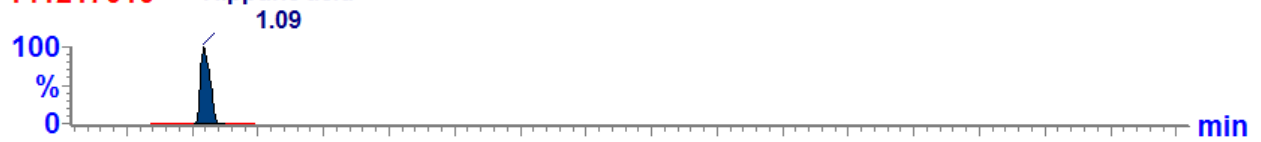

141217016

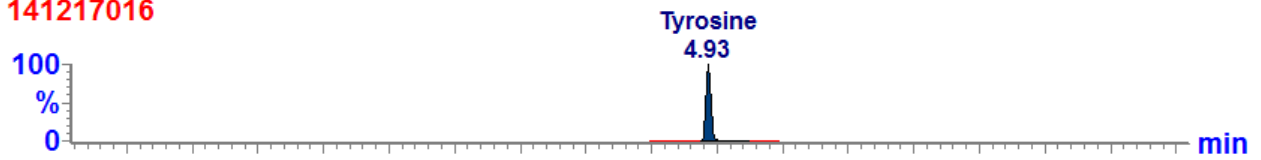

141217016 4-Pyridoxic Acid

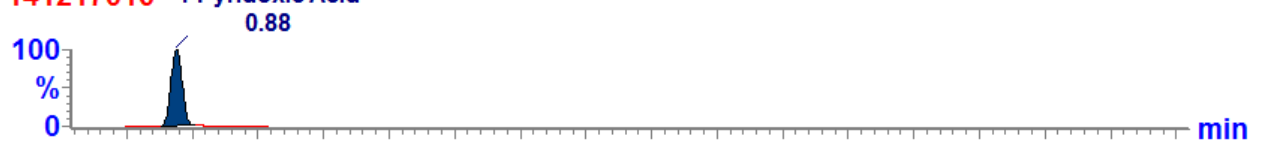

141217016

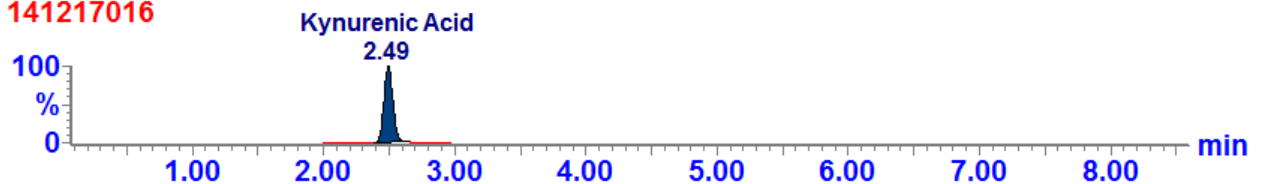

141217018

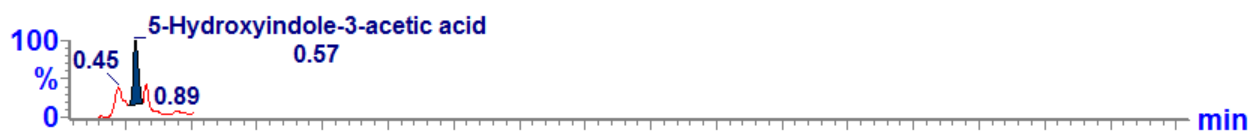

141217018

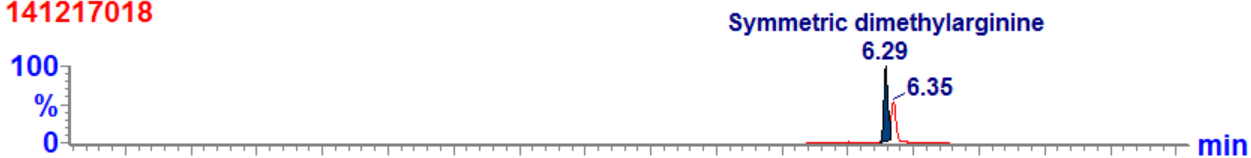

141217018

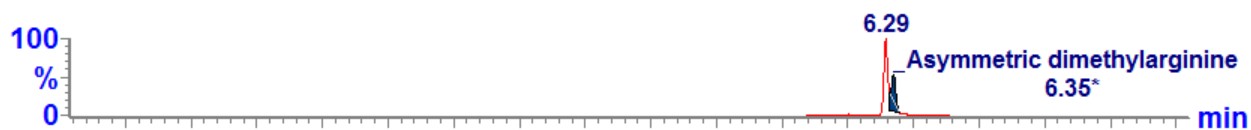

141217018

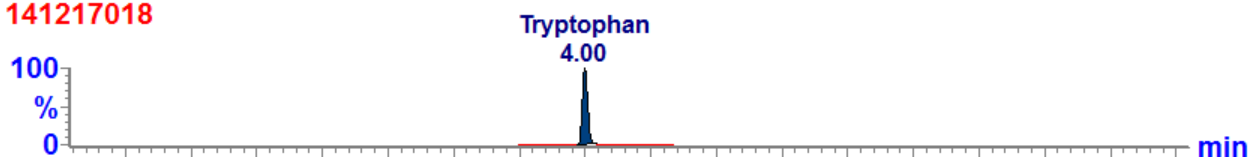

141217018

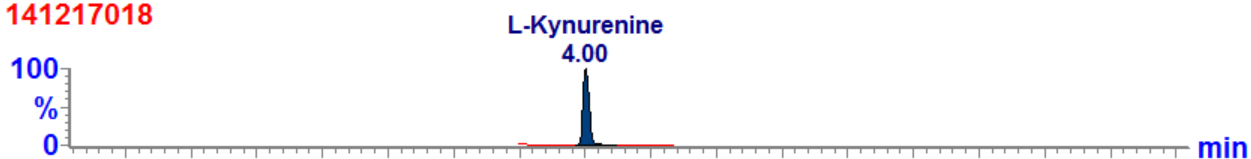

141217018

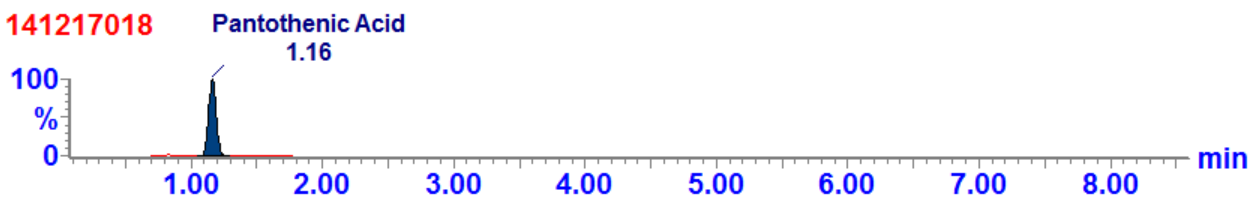



141217016

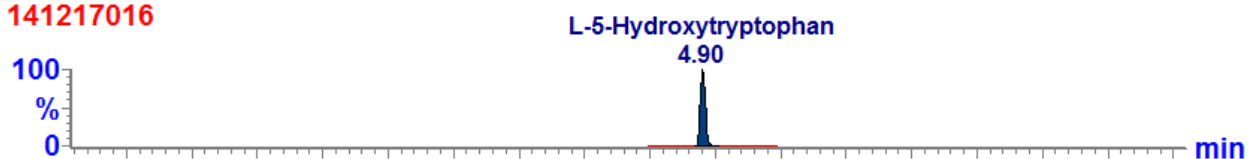

141217016

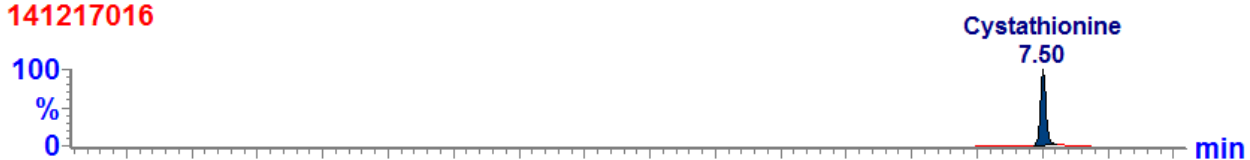

141217016

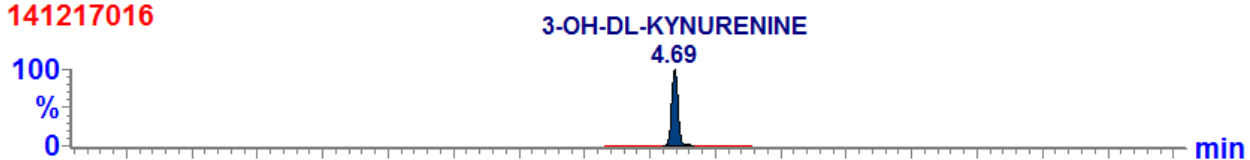

141217016

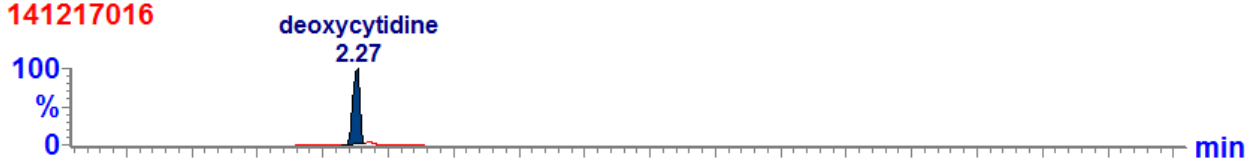

141217016

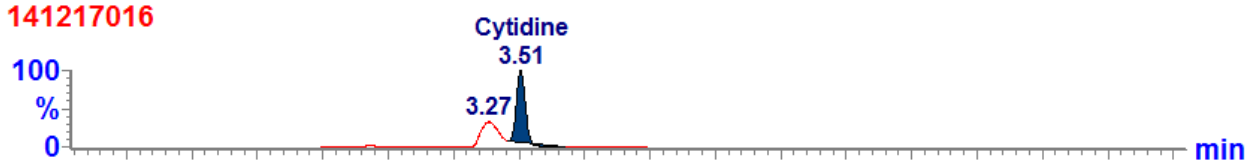

141217016

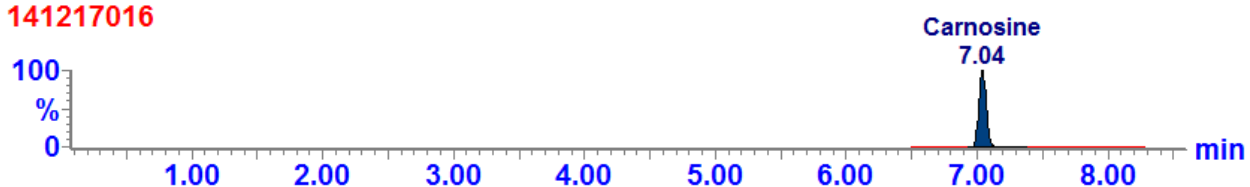

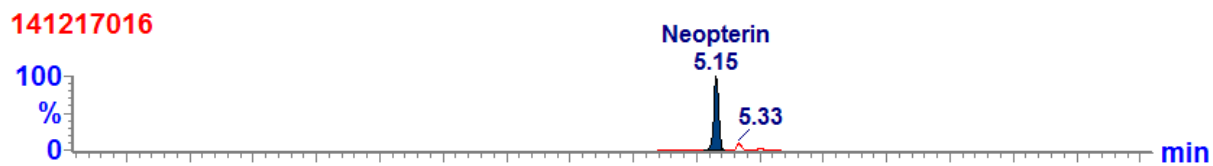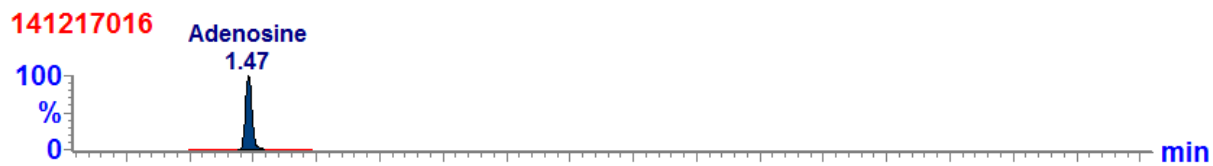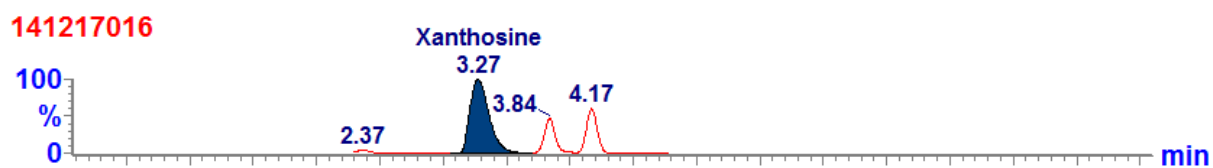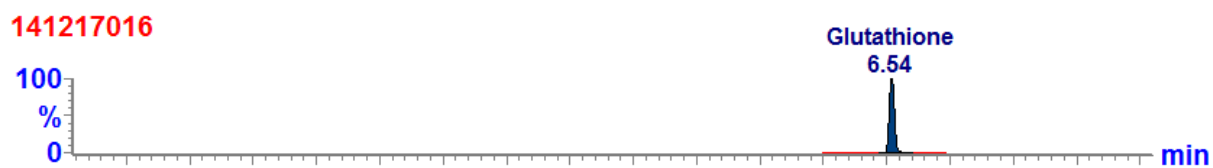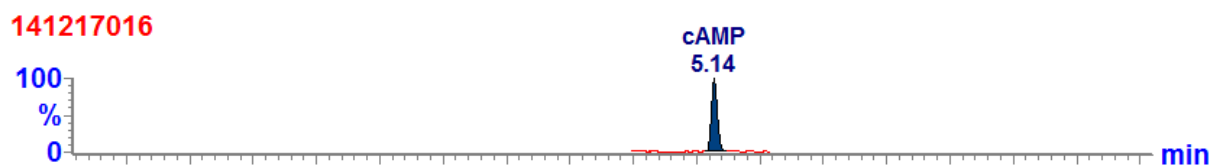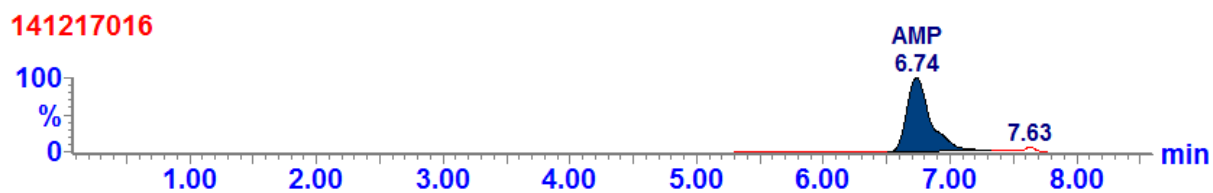

141217016

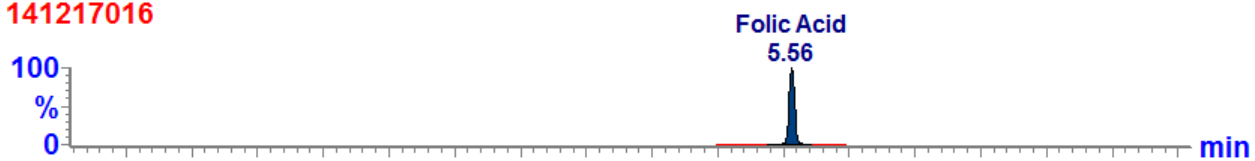

141217016

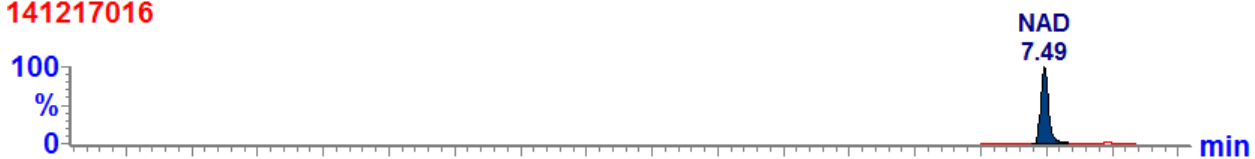

141217016

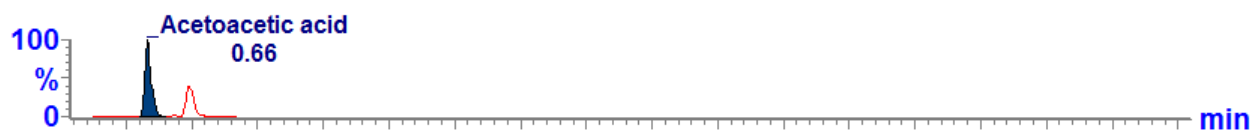

141217016

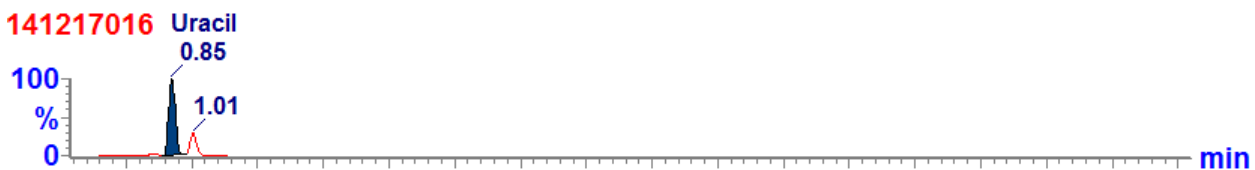

141217016

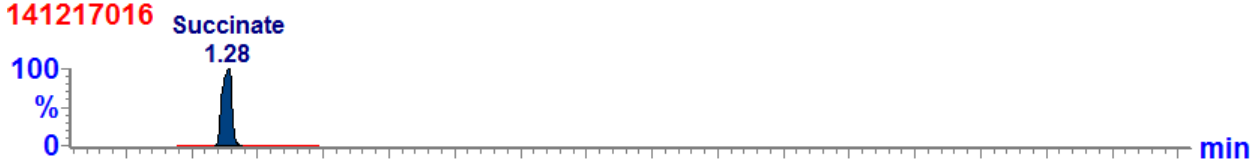

141217016

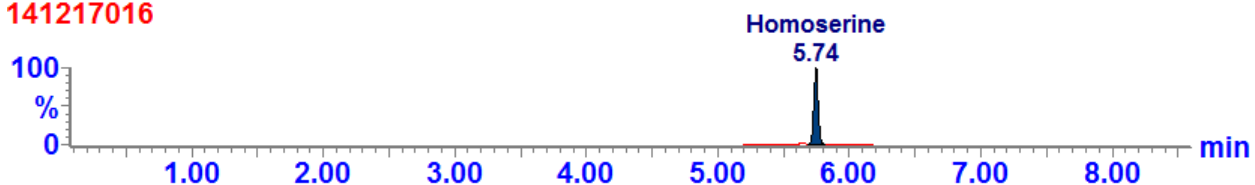

141217016

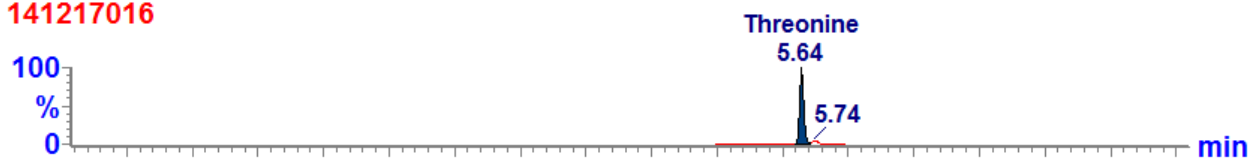

141217016

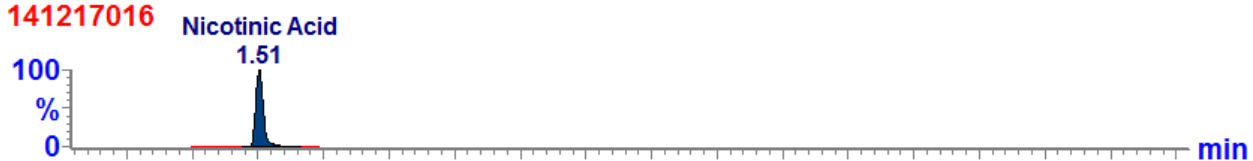

141217016

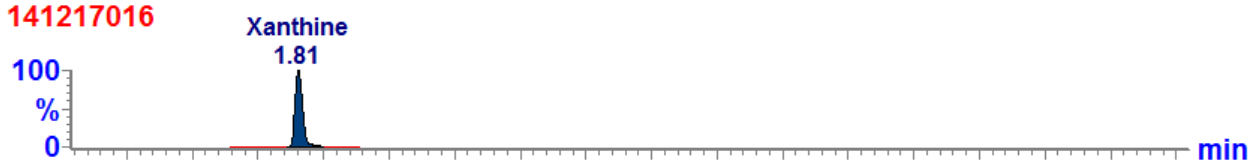

141217016

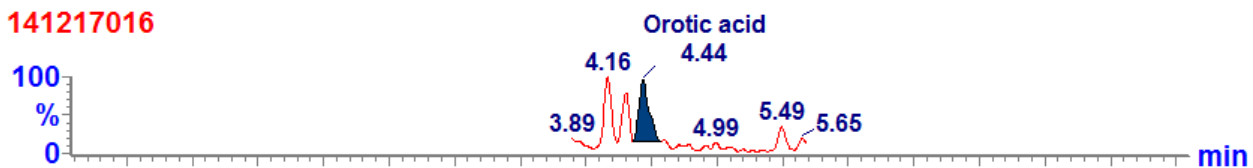

141217016

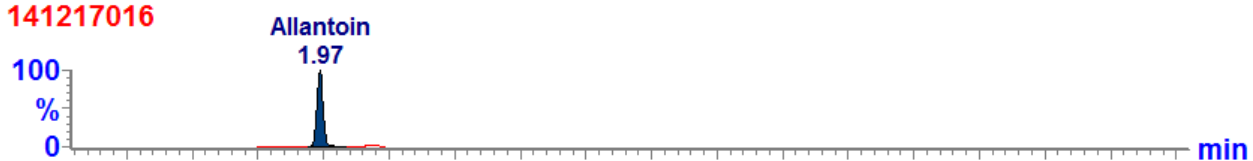

141217016

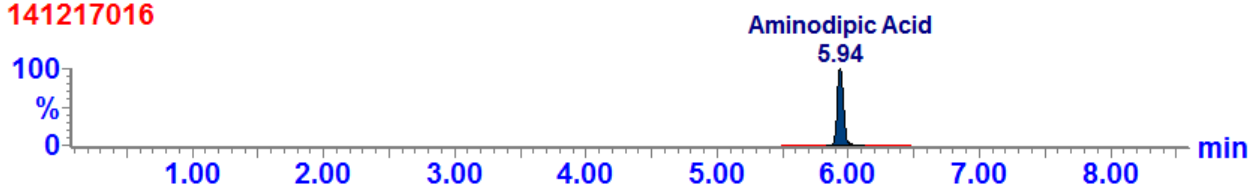

141217016 Homogentisic acid  
0.86

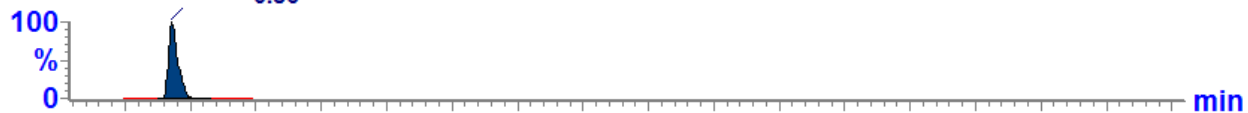

141217016

Myoinositol  
6.17

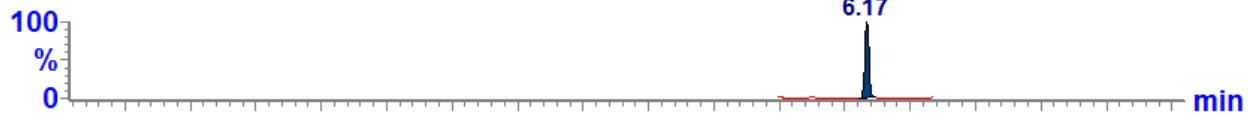

141217016

Sorbitol  
4.75

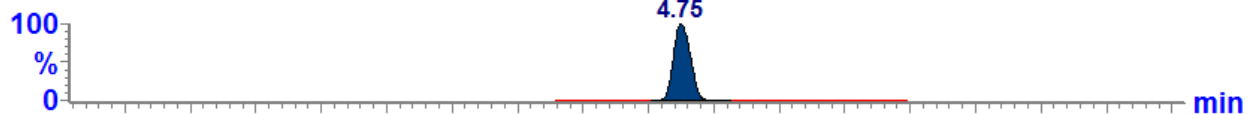

141217016

D-Glucuronic acid  
6.53

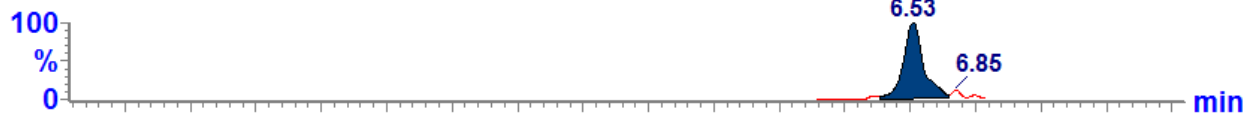

141217016 2-deoxyuridine  
1.01

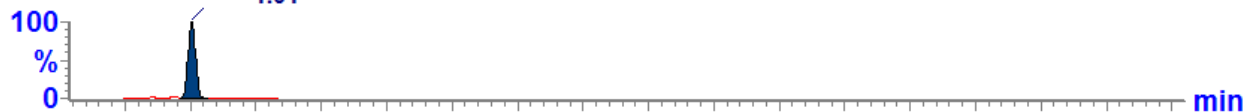

141217016

D-Ribose 5-phosphate  
6.93

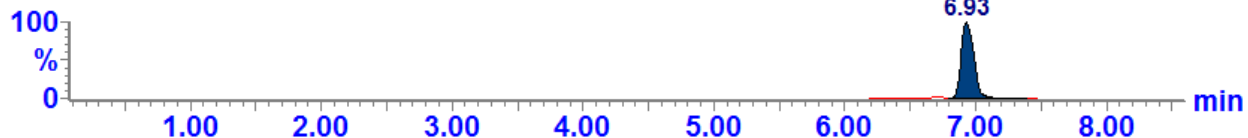

141217016

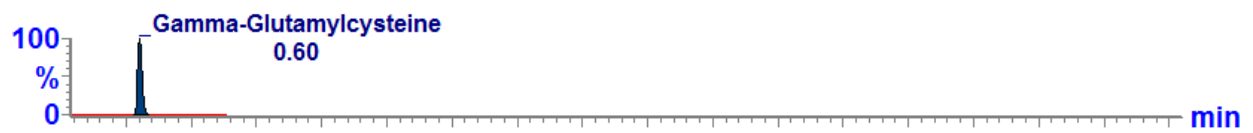

141217016

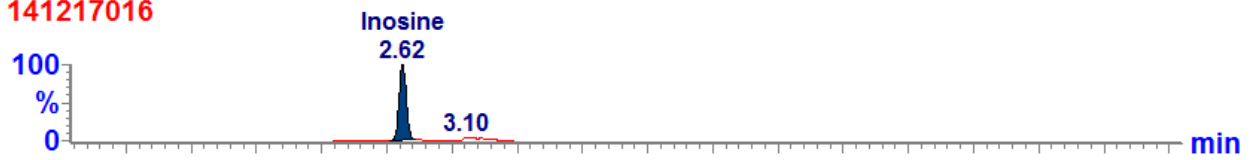

141217016

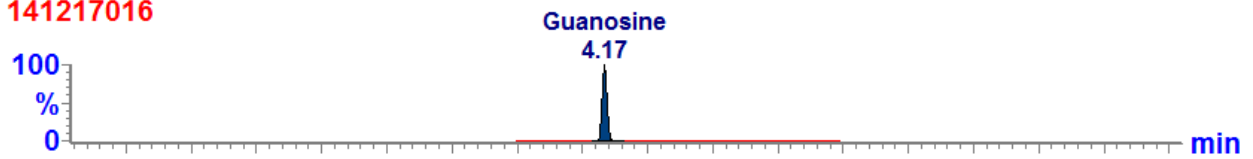

141217016

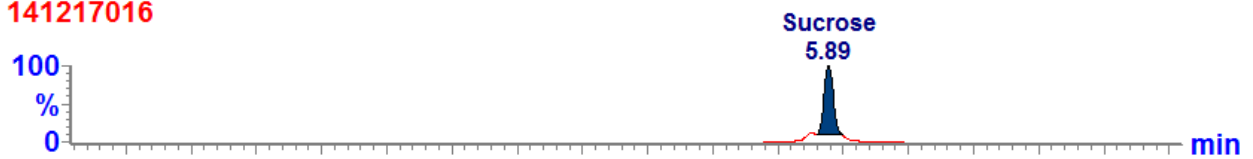

141217016

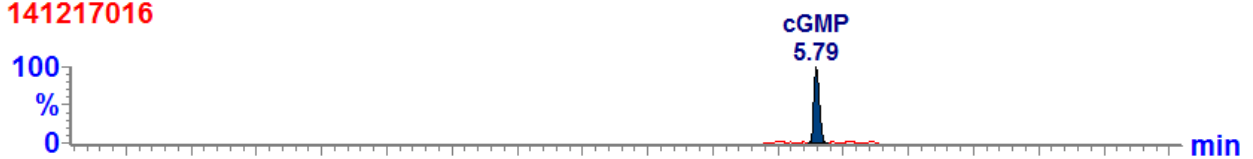

141217016

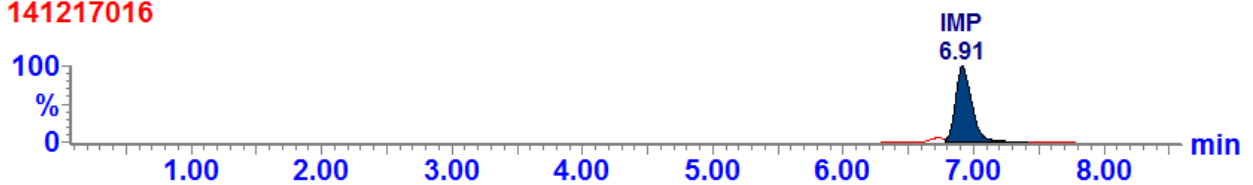

141217016

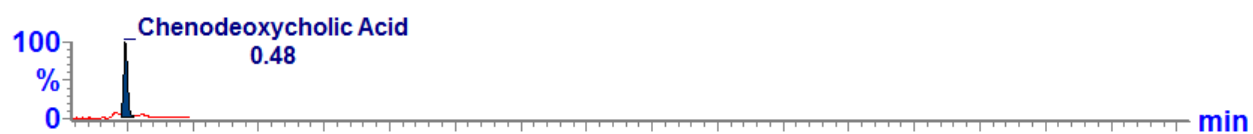

141217016

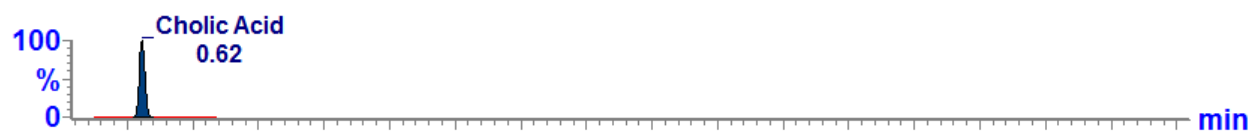

141217016

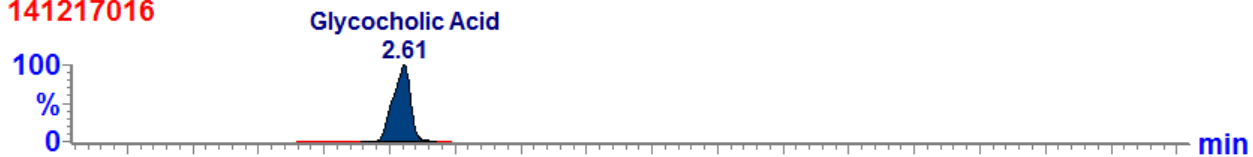

141217016

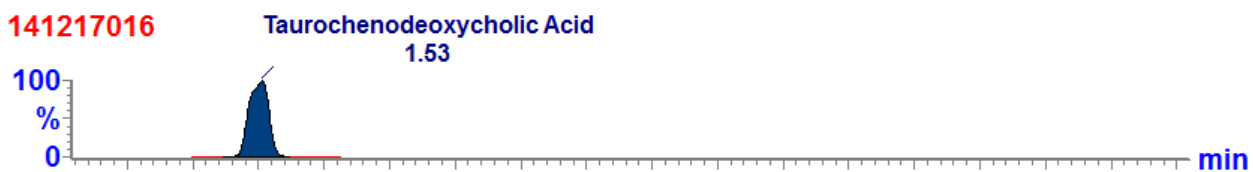

141217016

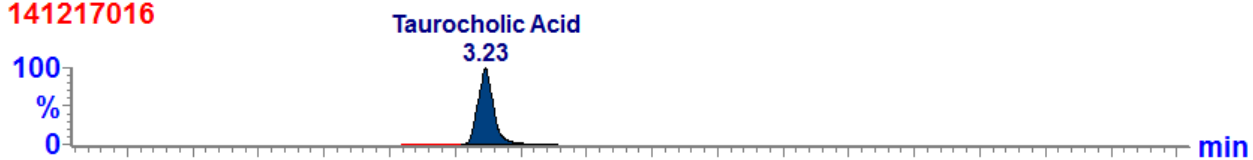

141217016

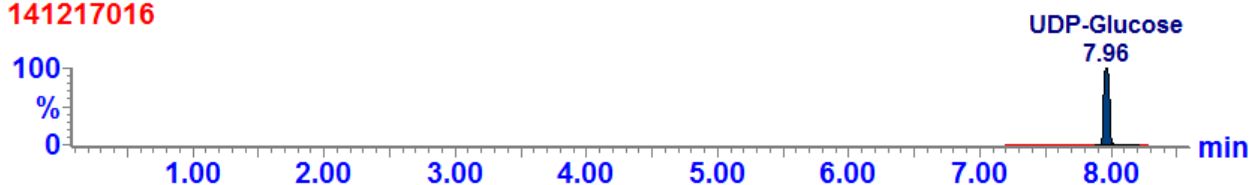

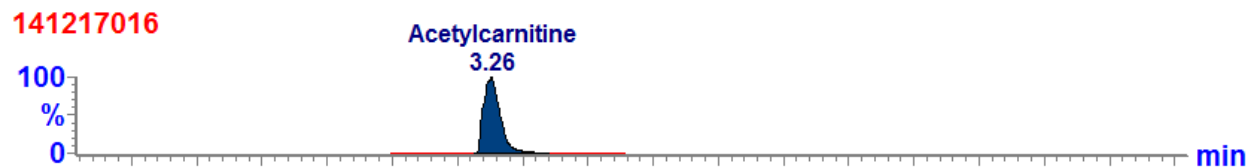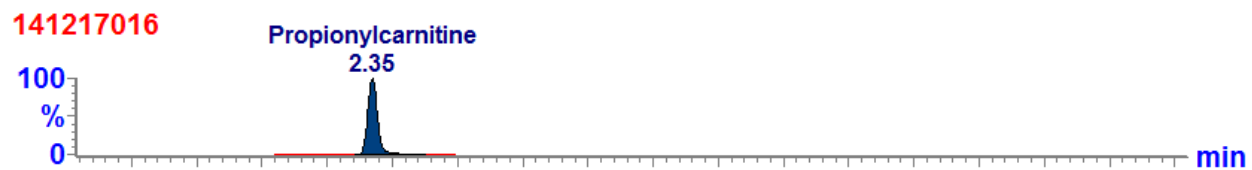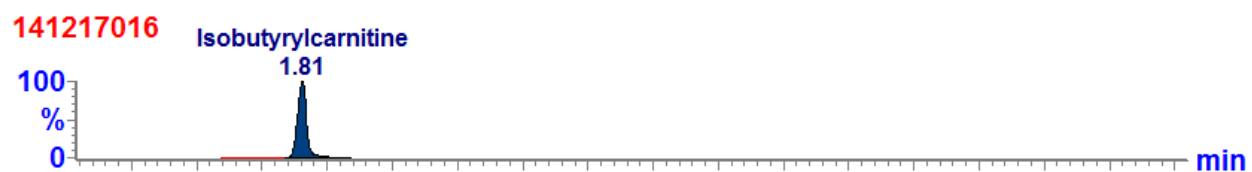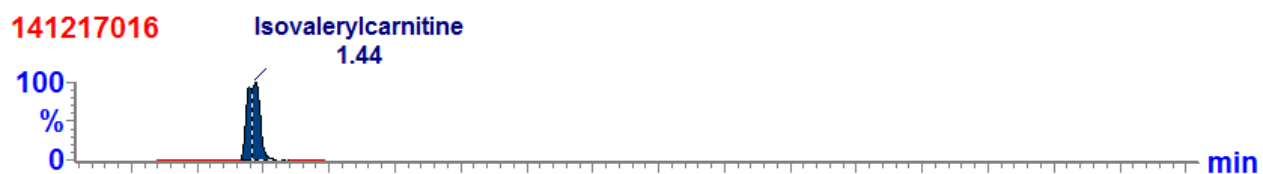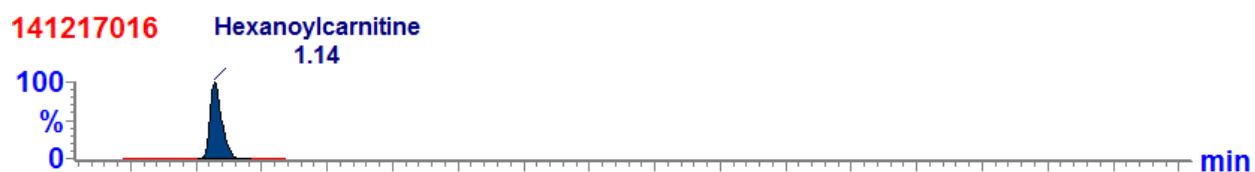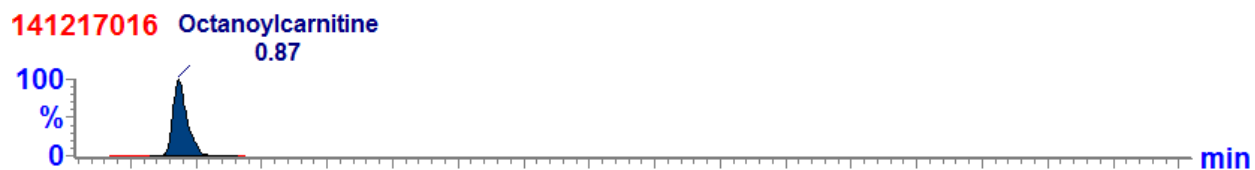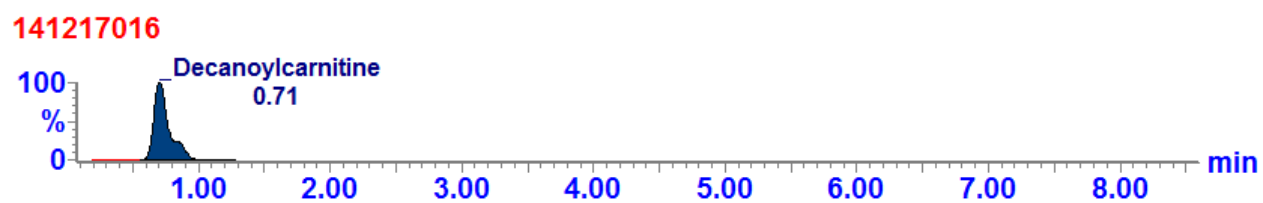

Supplement: s1 [file s1]
